# Supplementary material for: Ustilago maydis Secreted Endo-Xylanases Are Involved in Fungal Filamentation and Proliferation on and Inside Plants
Source: MDPI journal article supplement (doi:10.3390/jof7121081), 2021-12-15
Supplement: s1 [file s1]

**Supplementary Table S1.** List of primers used in this study.

| Name                  | Sequence (5' – 3')                                        | Use                                   |
|-----------------------|-----------------------------------------------------------|---------------------------------------|
| xyn1KO5-1             | TATCACAGACGCCACGCTCG                                      | <i>xyn1</i> deletion                  |
| xyn1KO5-2             | CACGGCCTGAGTGGCCGATCACAACACAAGAG<br>AGGAGGAGG             |                                       |
| xyn1KO3-1             | GTGGCCATCTAGGCCTTCGTGATTGAAGATGCG<br>TG                   |                                       |
| xyn1KO3-2             | CAAGTGTGAGTTGGGAGTGACG                                    |                                       |
| <i>xyn1CO5_fwd</i>    | <i>ACAGACACGAGAAGCAGGAGC</i>                              | <i>xyn1</i> deletion<br>validation    |
| <i>Nat2_rev</i>       | <i>TGTACGCATGTAACATTATACTGAAAACCT</i>                     |                                       |
| <i>Nat1_fwd</i>       | <i>TGGCTGCTGATCACAGCAAGTCAGATT</i>                        |                                       |
| <i>xyn1CO3_rev</i>    | <i>AGGTGAAAGGTGAAATGTGC</i>                               |                                       |
| <i>xyn1KOint-1</i>    | <i>TTCGTCACCAACAAGATGTGC</i>                              |                                       |
| <i>xyn1KOint-2</i>    | <i>CCCACATGGATACACCAAAGG</i>                              |                                       |
| xyn2KO5-1             | TAATCTGGCAGGGAGCTACG                                      | <i>xyn2</i> deletion                  |
| xyn2KO5-2             | CACGGCCTGAGTGGCCCCAGTGACCATTGCGTT<br>TGC                  |                                       |
| xyn2KO3-1             | GTGGCCATCTAGGCCTTTGGACGATGCTGAGAA<br>AGG                  |                                       |
| xyn2KO3-2             | TGCGAAGCAAAGAAAGACTACG                                    |                                       |
| <i>xyn2CO5_fwd</i>    | <i>CAAGCCTAACAAAGCTACCACG</i>                             | <i>xyn2</i> deletion<br>validation    |
| <i>Gen1_rev</i>       | <i>TCTTCTGAGCGGGACTCTGG</i>                               |                                       |
| <i>Gen2_fwd</i>       | <i>GTACGGGTACATCGGATCTGC</i>                              |                                       |
| <i>xyn2CO3_rev</i>    | <i>AAGTGTAAGCCCACAACGAGG</i>                              |                                       |
| <i>xyn2KOint-1</i>    | <i>ATACGCTCGTCTGGCACTCG</i>                               |                                       |
| <i>xyn2KOint-2</i>    | <i>CAGTTCTTCTGGTTGAGGCAGG</i>                             |                                       |
| xyn11AKO5-1           | TAACGATCTCAGCCTCATGG                                      | <i>xyn11A</i> deletion                |
| xyn11AKO5-2           | CACGGCCTGAGTGGCCATGGAGTTCGGAGACTG<br>GTTCCG               |                                       |
| xyn11AKO3-1           | GTGGCCATCTAGGCCTTACTAATCCGACGCTGA<br>AGG                  |                                       |
| xyn11AKO3-2           | CTTGTACCTCAACGCACTCC                                      |                                       |
| <i>xyn11ACO5_fwd</i>  | <i>ACTTCAAGTATGACCAGCACG</i>                              | <i>xyn11A</i> deletion<br>validation  |
| <i>hyg1_rev</i>       | <i>AAGTTTGCAGAACTCGCTGG</i>                               |                                       |
| <i>hyg2_fwd</i>       | <i>CGATGGCTGTCTAGAAGTACTGCGCGATAG</i>                     |                                       |
| <i>xyn11ACO3_rev</i>  | <i>ACATCGAGGCAGAACCAAGTACC</i>                            |                                       |
| <i>xyn11AKOint-1</i>  | <i>TGAAGATTACAACCCAGGTCC</i>                              |                                       |
| <i>xyn11AKOint-2</i>  | <i>GAACAGGTGACTCGAAGTGC</i>                               |                                       |
| <i>Probe_nat_fwd</i>  | <i>AAAAGGGGGACGGATCTAGG</i>                               | Nat probe for Southern<br>Blot        |
| <i>Probe_nat_rev</i>  | <i>ACTGGATGGGTCCTTCACC</i>                                |                                       |
| <i>Probe_gen_fwd</i>  | <i>TACCGTAAAGCACGAGGAAGC</i>                              | Geneticin probe for<br>Southern Blot  |
| <i>Probe_gen_rev</i>  | <i>CTCGACGTTGTCACTGAAGC</i>                               |                                       |
| <i>Probe_hyg_fwd</i>  | <i>AAACTGTGATGGACGACACC</i>                               | Hygromycin probe for<br>Southern Blot |
| <i>Probe_hyg_rev</i>  | <i>GCTCTATTCCTTTGCCCTCG</i>                               |                                       |
| <i>Pxyn1_fwd</i>      | <i>AGCAACGAGTCGACATCT</i>                                 | <i>xyn1</i> complementation           |
| <i>XmaI_Pxyn1_rev</i> | <i>TATCCCGGGTTTGATGAAGAGAAGATA</i>                        |                                       |
| <i>Pxyn2_fwd</i>      | <i>ACACTATAGAACTCGAGCAGAGTCGGCAAGCA</i><br><i>AAACCG</i>  | <i>xyn2</i> complementation           |
| <i>Pxyn2_rev</i>      | <i>TGGTCTTCATTGTGGAGGTAGGCTCTAAG</i>                      |                                       |
| <i>xyn2_fwd</i>       | <i>TACCTCCACAATGAAGACCAACTTCTCG</i>                       |                                       |
| <i>xyn2_rev</i>       | <i>TGAACGATCTGCAGCCGGGCTCAAGCTTGGTAC</i><br><i>GAGTTG</i> |                                       |
| <i>Pxyn11A_fwd</i>    | <i>ACACTATAGAACTCGAGCAGGGGTGAGTTCGAT</i><br><i>TATCG</i>  | <i>xyn11A</i><br>complementation      |

|                                |                                                        |                                    |
|--------------------------------|--------------------------------------------------------|------------------------------------|
| Pxyn11A_rev                    | CAAAC TTCATCTTGAATGTTCTGAAGAAGAG                       |                                    |
| xyn11A_fwd                     | AACATTCAAGATGAAGTTTGCCACTGTC                           |                                    |
| xyn11A_rev                     | TGAACGATCTGCAGCCGGGCTCAACCAGAGAC<br>GGACATC            |                                    |
| N_Sdh2_fwd                     | TCCTGTCTTTTCGGCAAGACTCTTCG                             |                                    |
| N_pDL51_otef_rev               | TGGTGCACTCTCAGTACAATCTGC                               | Ip locus integration<br>validation |
| Amp1_fwd                       | TTCTGTGACTGGTGAGTACTCAACC                              |                                    |
| N_Sdh2_rev                     | TAAGTGACGATTGCGAGTTCTCTTGG                             |                                    |
| BamHI_xyn2_fwd                 | ACGGGATCCATGAAGACCAACTTTCTCG                           |                                    |
| NcoI_xyn2_rev                  | TCACCATGGCTCCAGCTTGGTACGAGTTGAGAG<br>TGC               | xyn2 gfp tagging                   |
| BamHI_xyn11A_fw<br>d           | ACGGGATCCATGAAGTTTGCCACTGTCC                           | xyn11A gfp tagging                 |
| NcoI_xyn11A_rev                | TCACCATGGCTCCACCAGAGACGGACATCG                         |                                    |
| BamHI_xyn3_fwd                 | ACGGGATCCATGCCCCGACATCCTCATTTAGG                       |                                    |
| NcoI_xyn3_rev                  | TCACCATGGCCTTCGGATCGAGCTTGTGTTTGAC                     | xyn3 gfp tagging                   |
| SacII_xyn1_fwd                 | ATACCGCGGATGGTGAGCTCTAAGCTCGCCTTC                      |                                    |
| XbaI_xyn1_rev                  | TATTCTAGACTTGCGACGTCGACGGTACGCCAT<br>G                 | xyn1 mCherry-HA<br>tagging         |
| SacII_xyn2_fwd                 | TTACCGCGGATGAAGACCAACTTTCTCG                           |                                    |
| NcoI-<br>RSIATA_xyn2_rev       | ATACCATGGCGGTGGCGATCGAGCGTTAGCTT<br>GGTACGAGTTG        | xyn2 mCherry-HA<br>tagging         |
| SacII_xyn11A_fwd               | TTACCGCGGATGAAGTTTGCCACTGTCCTTGC                       |                                    |
| NcoI-<br>RSIATA_xyn11A_re<br>v | ATTATACCATGGCGGTGGCGATCGAGCGTCCAC<br>CAGAGACGGACATCGAG | xyn11A mCherry-HA<br>tagging       |
| ppi_qPCR_fwd                   | ACATCGTCAAGGCTATCG                                     |                                    |
| ppi_qPCR_rev                   | AAAGAACACCGGACTTGG                                     |                                    |
| gapdh_qPCR_fwd                 | CTTCGGCATTGTTGAGGGTTTG                                 | Biomass quantification             |
| gapdh_qPCR_rev                 | TCCTTGGCTGAGGGTCCGTC                                   |                                    |

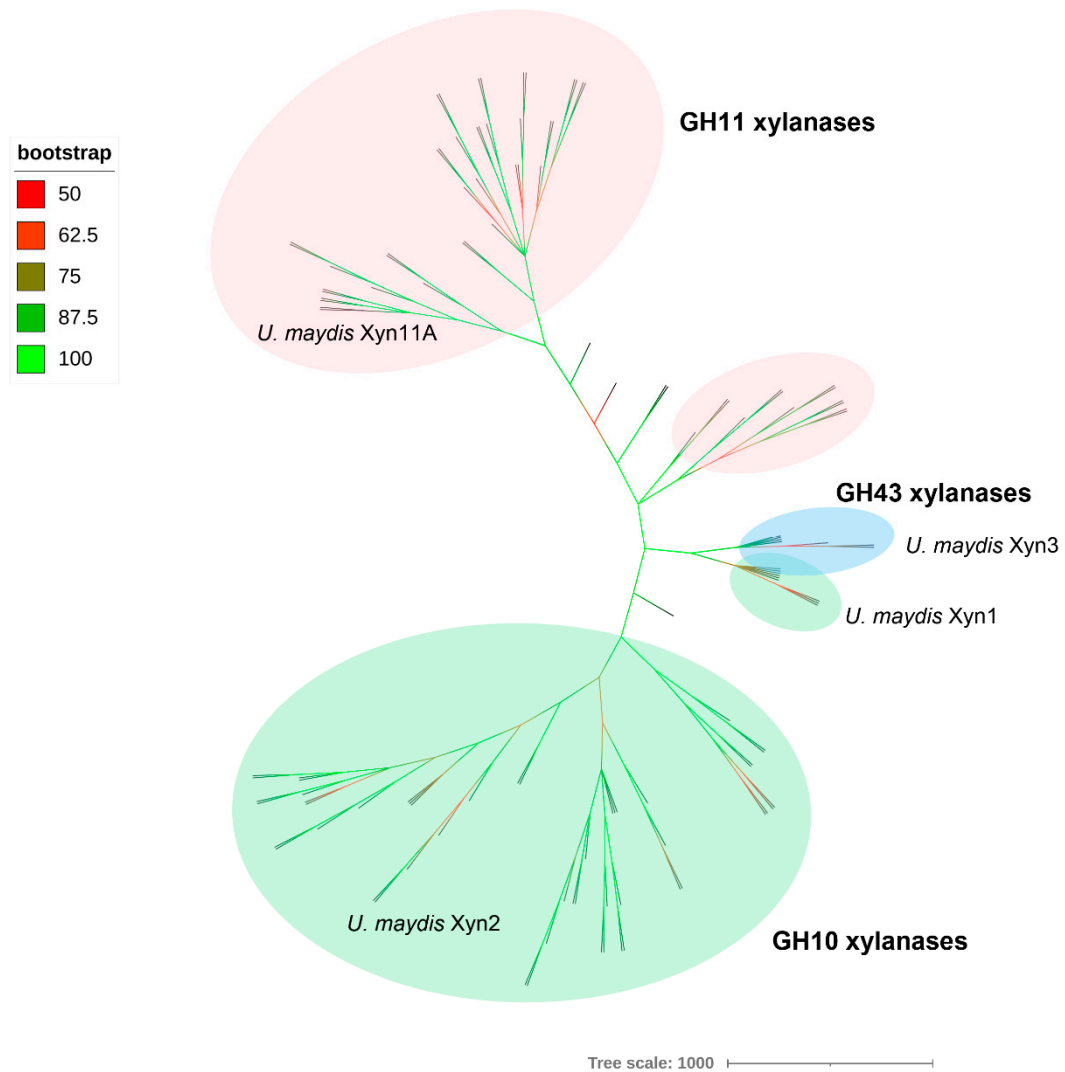

**Figure S1. Fungal xylanases phylogenetic tree.** An unrooted phylogenetic tree of xylanases from different Basidiomycetes and Ascomycetes plant pathogens was built (see Material and Methods for details). The tree was generated by applying the Neighbor-Join algorithm and the Jukes-Cantor genetic distance model to the 126 selected xylanase sequences previously aligned by Geneious alignment (Geneious Prime 2019.2.1). Xylanases from *U. maydis* Xyn1, Xyn2, Xyn11A and Xyn3 are indicated near to their nodes. Glycoside Hydrolase (GH) xylanases families are color-coded: green for GH10, red for GH11 and blue for GH43. Bootstraps are indicated in the branches with color gradient from red (50) to green (100).

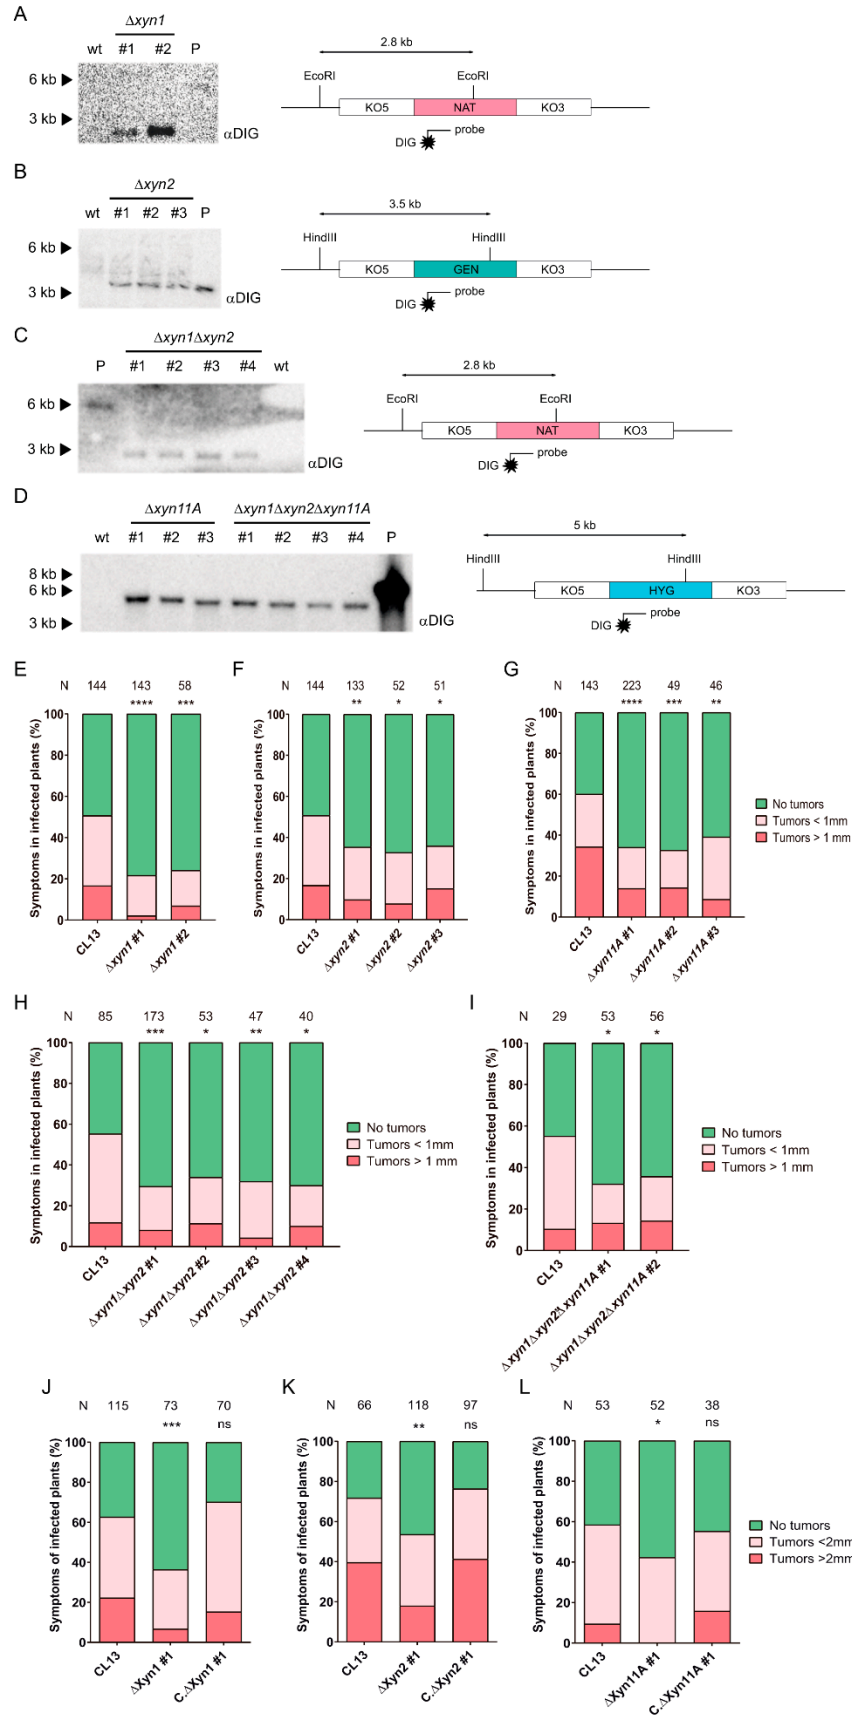

**Figure S2. Xylanases mutant clones contain a single cassette integration, have similar virulence defects and are complemented with endogenous loci. (A-D)** Southern blots of independent clones of  $\Delta xyn1$  (A),  $\Delta xyn2$  (B),  $\Delta xyn1\Delta xyn2$  (C),  $\Delta xyn11A$  and  $\Delta xyn1\Delta xyn2\Delta xyn11A$  mutants (D) were performed in CL13

background. Representation of the binding site for each probe in the resistance markers (nourseothricin – NAT, geneticin – GEN, hygromycin – HYG) and the expected size of the band is represented in each panel. DNA from *wild-type* CL13 strain (wt) and each plasmid (P) containing xylanase deletion cassette was used as negative and positive controls, respectively. (E-I) Quantification of symptoms 14 days after infecting plants with independent clones of  $\Delta xyn1$  (E),  $\Delta xyn2$  (F),  $\Delta xyn11A$  (G),  $\Delta xyn1\Delta xyn2$  (H) and  $\Delta xyn1\Delta xyn2\Delta xyn11A$  mutants (I). (J-L) Quantification of symptoms 14 days after infecting plants with xylanases mutants complemented with the corresponding xylanase gene. Total number of infected plants is indicated above each column. At least two biological replicates were analyzed. Mann-Whitney statistical test was performed for each mutant versus the CL13 *wild-type* strain (ns for non-statistically significant; \* for p-value < 0.05; \*\* for p-value < 0.01; \*\*\* for p-value < 0.005; \*\*\*\* for p-value < 0.001).

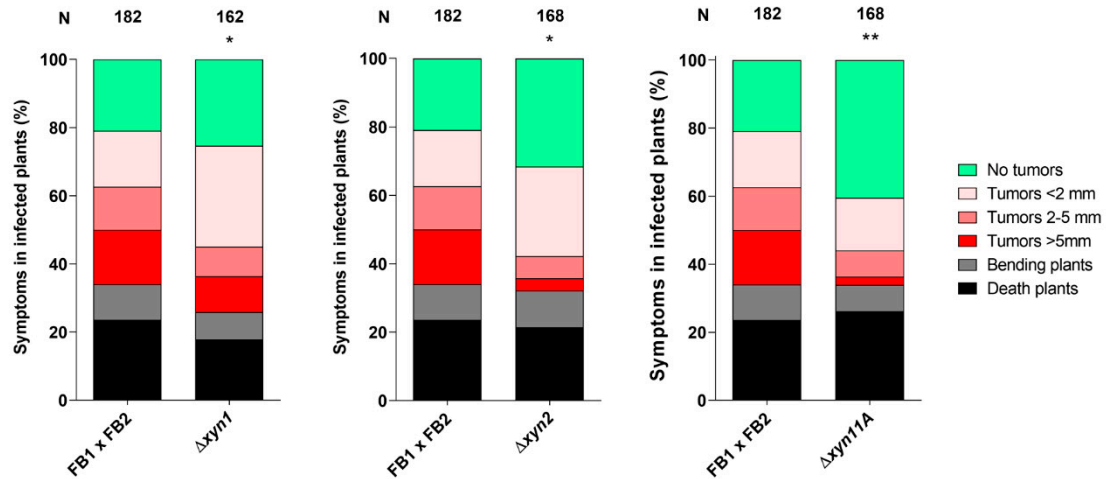

**Figure S3. Infection assay for xylanases mutants in FB1 x FB2 strains.** Quantification of plant symptoms infected with the indicated strains 14 days post infection. Total number of infected plants, corresponding to six biological replicates, is indicated above each column. The Mann-Whitney statistical test was performed for each mutant versus *wild-type* FB1 x FB2 strains (\* for p-value < 0.05; \*\* for p-value < 0.01).

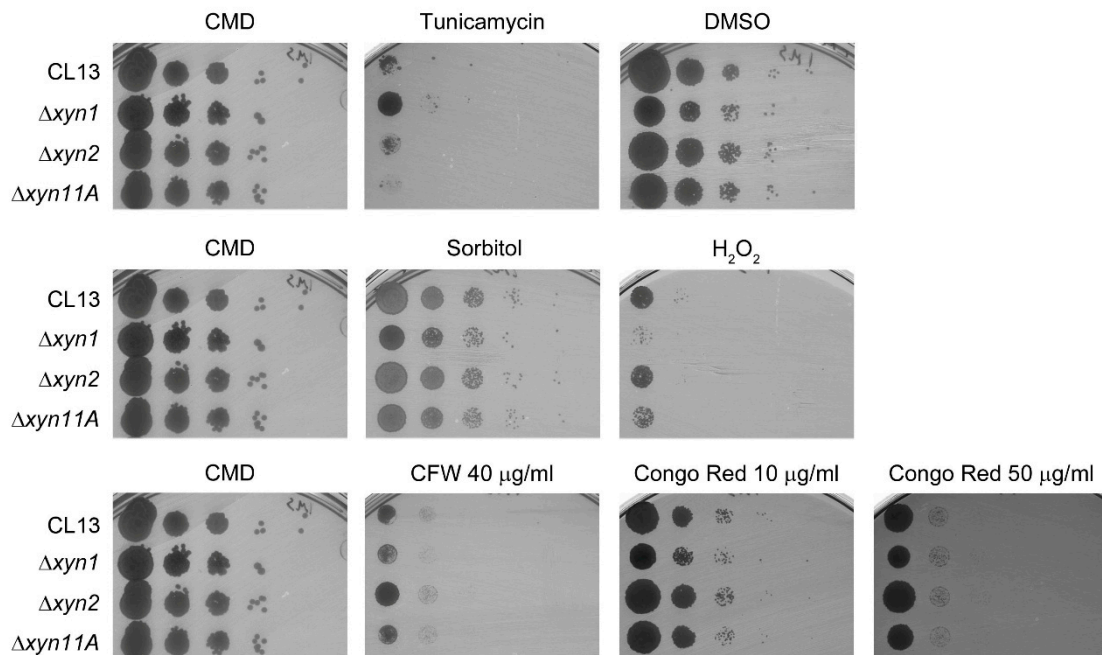

**Figure S4. Stress and cell wall integrity assays for xylanases defective mutants.** ER stress (Tunicamycin), osmotic stress (Sorbitol), oxidative stress ( $H_2O_2$ ) and cell wall integrity (CFW and Congo Red) assays were

performed in rich media supplemented with 2% D-glucose (CMD) and 1  $\mu\text{g/ml}$  Tunicamycin, 2% DMSO as tunicamycin solvent control, 1M Sorbitol, 1.5 mM  $\text{H}_2\text{O}_2$ , 50  $\mu\text{g/ml}$  calcofluor white (CFW), and 10 and 50  $\mu\text{g/ml}$  Congo Red.

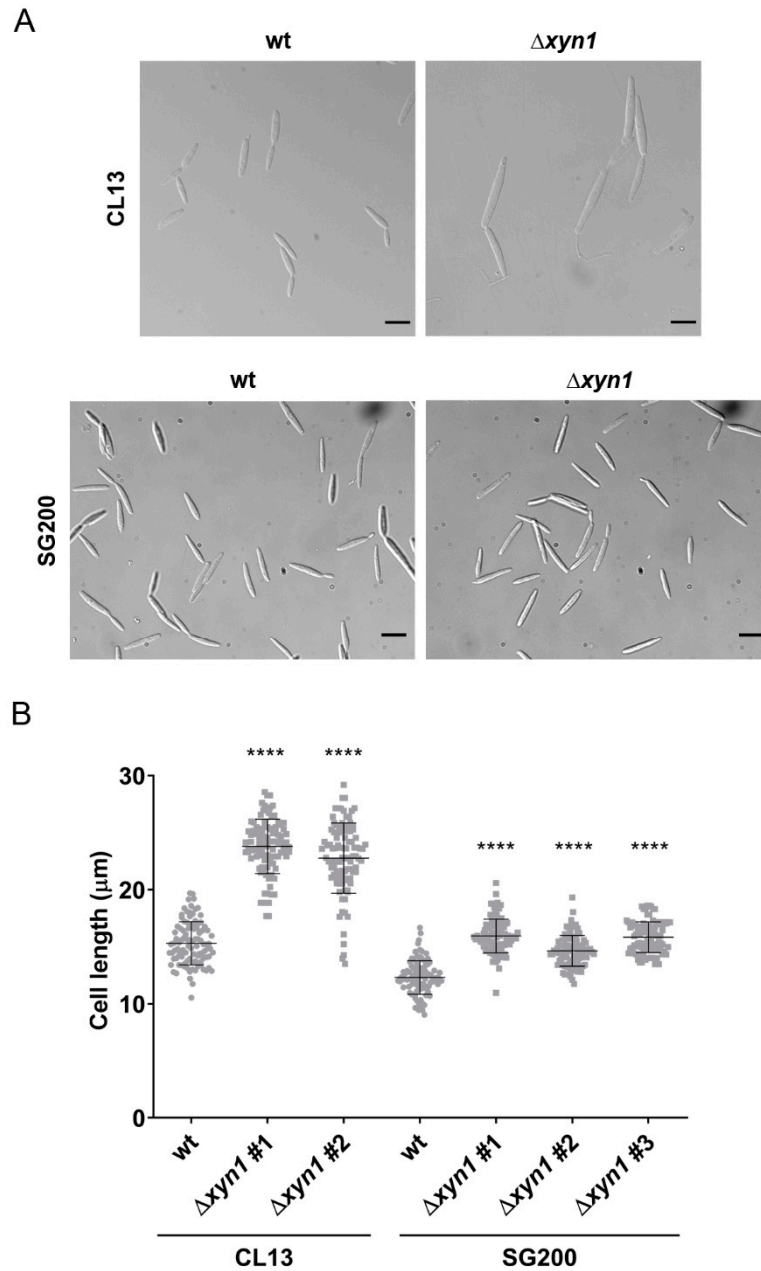

**Figure S5. Lack of *xyn1* affects cell length in both CL13 and SG200 backgrounds.** **A)** Cells were visualized by differential interference contrast (DIC) microscopy to analyze cellular morphology. Scale bars represent 10  $\mu\text{m}$ . **B)** The lengths of CL13 *wild-type*, CL13  $\Delta xyn1$  (two independent clones), SG200 *wild-type* and SG200  $\Delta xyn1$  (three independent clones) strains were measured in rich media cultures at exponential phase. Quantification was done for 100 cells each from two biological replicates. T-test statistical analysis comparing each mutant versus the corresponding *wild-type* was performed (\*\*\*\* for p-value < 0.001).
